# Supplementary material
Source: Springer Nature journal article supplement (https://www.springermedizin.de/resource/supplementary/12936_2013_3033_MOESM1_ESM.pdf/9544912)

$$Y = 1.654 + 0.06 * X, r^2 = 0.021$$

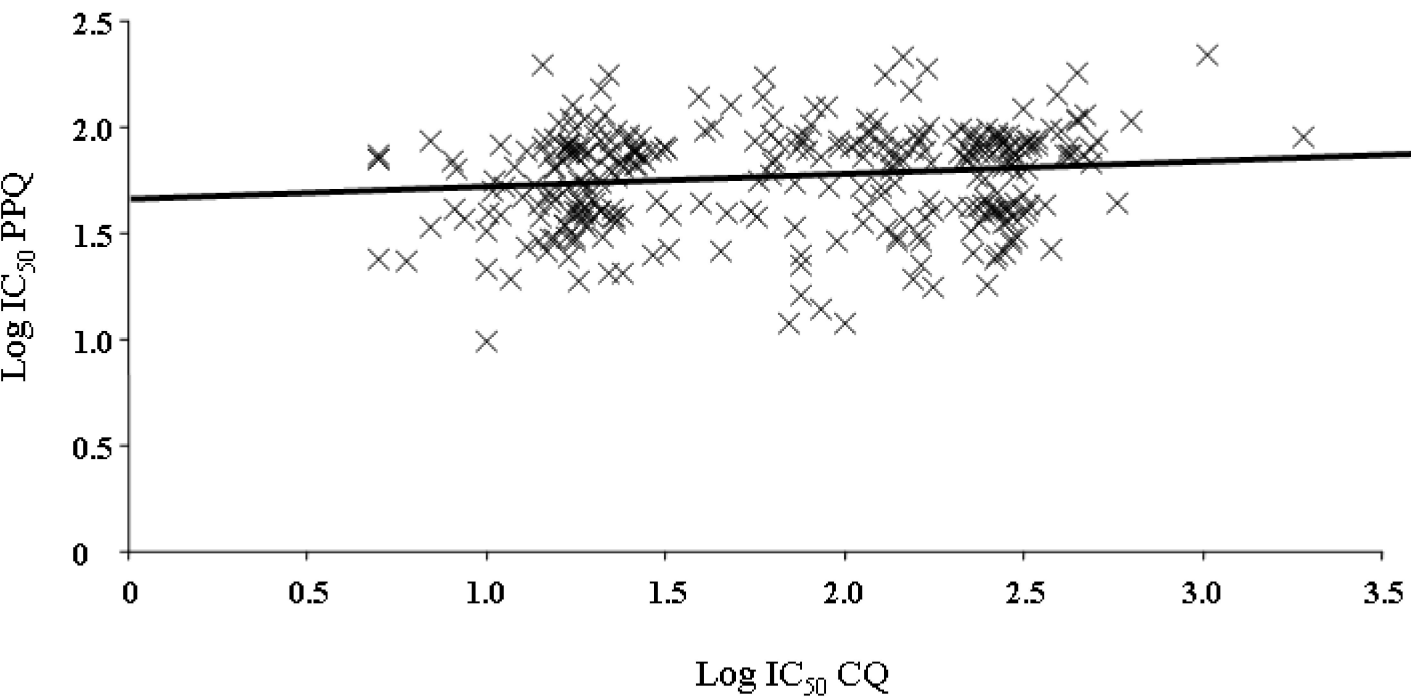

Supplement: MOESM1 [file 9544912]
